# Supplementary material for: Characterization of the ABC Transporter G Subfamily in Pomegranate and Function Analysis of PgrABCG14
Source: MDPI journal article supplement (doi:10.3390/ijms231911661), 2022-10-01
Supplement: s1 [file s1]

Table S5. The gene-specific primers used in this study.

| gene             | Sequence of forward primer      | Sequence of reverse primer       | Product size (bp) |
|------------------|---------------------------------|----------------------------------|-------------------|
| <i>PgrABCG14</i> | 5'- GCCCGACCCTATCACATTTATC -3'  | 5'- GTCGCCTGCTTCACATCCAT -3'     | 114               |
| <i>PgrABCG21</i> | 5'- TACGAGTGTGGAAATGGGGC -3'    | 5'- CAAAGCAGCAACATCCCACC -3'     | 96                |
| <i>PgrABCG47</i> | 5'- TCGGACCAGTACAAGGCAAC -3'    | 5'- TGTTTCCACAGACACGCAGT - 3'    | 134               |
| <i>AtC4H</i>     | 5'- TCGTGCCTCACATGAACCTC -3'    | 5'-GCTTCCACGTGCGATTCTTC - 3'     | 169               |
| <i>AtCAD5</i>    | 5'- GTAATTGACACGGTGCCTGTTC -3'  | 5'- GCTCCCCGTTATCACTTTCCTC - 3'  | 153               |
| <i>AtPrx71</i>   | 5'- CCGGCACTAGGATTGGGTTT -3'    | 5'- GGATCGAACCGTCACAACCT - 3'    | 162               |
| <i>AtARR5</i>    | 5'- ATGGCTGAGGTTTTGCGTCC -3'    | 5'- GAGACTCTGAGTAACCGCTCG - 3'   | 140               |
| <i>AtARR6</i>    | 5'- CAATGCCCCGGTATGACTGGA -3'   | 5'- TCCGAGAGTTTTACCGGCTT - 3'    | 169               |
| <i>AtARR7</i>    | 5'- CGGAGTTGCATGTTCTTGCC -3'    | 5'- TTAGAAGCCCCTTTGCCTCC - 3'    | 154               |
| <i>AtARR15</i>   | 5'- AGGTGGTGAAGCTGAAGAAGG -3'   | 5'- TGGAGTGTGTCGTCATCAAGGG - 3'  | 145               |
| <i>PgrActin7</i> | 5'- TATTGTTGGTCGTCCCAGGC -3'    | 5'- CCTCTCTTCGATTGGGCCTC - 3'    | 90                |
| <i>AtActin2</i>  | 5'- GGTAACATTGTGCTCAGTGGTGG -3' | 5'- AACGACCTTAATCTTCATGCTGC - 3' | 108               |
