# Supplementary material for: Characterization of the ABC Transporter G Subfamily in Pomegranate and Function Analysis of PgrABCG14
Source: MDPI journal article supplement (doi:10.3390/ijms231911661), 2022-10-01
Supplement: s1 [file s1]

Table S4. The transcriptome data (FPKM values) of *PgrABCGs* in different tissues.

[illegible]

|                         |        |        |        |        |       |       |       |        |       |       |       |      |
|-------------------------|--------|--------|--------|--------|-------|-------|-------|--------|-------|-------|-------|------|
| Pgr013392.1 (PgrABCG17) | 3.01   | 2.94   | 2.08   | 3.53   | 2.51  | 1.51  | 2.69  | 2.13   | 2.72  | 2.82  | 2.08  | 2.29 |
| Pgr019302.7 (PgrABCG18) | 0      | 0      | 0.17   | 0      | 0     | 0     | 0     | 0      | 0     | 0     | 0     | 0    |
| Pgr021626.1 (PgrABCG19) | 0.28   | 0.2    | 0.96   | 0      | 0     | 0     | 0     | 0      | 0     | 0.03  | 0     | 0    |
| Pgr001931.1 (PgrABCG20) | 45.68  | 0.34   | 0.06   | 0      | 0     | 0     | 0.06  | 0      | 0.59  | 0.56  | 1.12  | 0.06 |
| Pgr009460.1 (PgrABCG21) | 2.5    | 3.04   | 2.31   | 0.61   | 1.14  | 12.37 | 0     | 0      | 0.07  | 0     | 1.95  | 3.17 |
| Pgr003186.1 (PgrABCG22) | 0      | 101.44 | 8.18   | 59.06  | 49.46 | 63.73 | 0.19  | 0.38   | 0.26  | 1     | 2.6   | 1    |
| Pgr025323.4 (PgrABCG23) | 7.82   | 0.08   | 0.15   | 0      | 0     | 0     | 0     | 0      | 0.38  | 0.32  | 1.51  | 0.29 |
| Pgr025550.1 (PgrABCG24) | 7.04   | 4.85   | 9.69   | 3.31   | 2.44  | 4.7   | 0.22  | 0.05   | 0     | 5.66  | 3.36  | 4.07 |
| Pgr007499.1 (PgrABCG25) | 4.88   | 0.08   | 0.55   | 0.5    | 0.16  | 0     | 0.16  | 0.16   | 0.4   | 0.75  | 0.84  | 0.31 |
| Pgr007422.1 (PgrABCG26) | 0.61   | 0.38   | 0.8    | 0.08   | 0.29  | 0.22  | 0.43  | 1      | 0.88  | 0.31  | 0.56  | 0.99 |
| Pgr025164.1 (PgrABCG27) | 118.05 | 59.41  | 13.64  | 37.79  | 4.73  | 3.2   | 24.79 | 10.33  | 12.75 | 2.45  | 19.77 | 4.35 |
| Pgr026882.1 (PgrABCG28) | 0.09   | 0.09   | 14.12  | 0      | 0.17  | 0.13  | 0     | 0      | 0.09  | 0.04  | 0.13  | 0.04 |
| Pgr012415.1 (PgrABCG29) | 123.15 | 17.62  | 12.55  | 8.33   | 1.73  | 4.11  | 13.84 | 11.52  | 15.62 | 2.89  | 5.89  | 7.57 |
| Pgr026142.1 (PgrABCG30) | 0.05   | 0      | 0      | 0      | 0     | 0     | 0     | 0      | 0     | 0     | 0     | 0.04 |
| Pgr024930.1 (PgrABCG31) | 0.1    | 0.21   | 114.77 | 0      | 0     | 0     | 0.03  | 0      | 0.07  | 0.08  | 0.06  | 0    |
| Pgr015424.1 (PgrABCG32) | 12.8   | 59.67  | 38.23  | 4.11   | 2.18  | 0.07  | 26.46 | 63.15  | 15.63 | 16.64 | 7.65  | 1.36 |
| Pgr008163.1 (PgrABCG33) | 5.88   | 1.12   | 1.77   | 5.2    | 0     | 0     | 0     | 0      | 0     | 0     | 0.07  | 0    |
| Pgr003278.1 (PgrABCG34) | 33.93  | 87.87  | 76.07  | 18.63  | 7.15  | 12.7  | 1.25  | 3.39   | 6     | 1.63  | 5.95  | 9.85 |
| Pgr025165.1 (PgrABCG35) | 965.47 | 61.6   | 176.96 | 155.46 | 92.49 | 38.25 | 83.05 | 101.97 | 43.52 | 14.96 | 50.81 | 19.8 |
| Pgr005475.1 (PgrABCG36) | 72.09  | 1.04   | 0.1    | 0.41   | 0.1   | 0.13  | 0.03  | 0.03   | 0.82  | 0.64  | 0.65  | 0.41 |

|                         |       |       |       |       |       |       |       |       |       |      |       |       |
|-------------------------|-------|-------|-------|-------|-------|-------|-------|-------|-------|------|-------|-------|
| Pgr020172.2 (PgrABCG37) | 8.19  | 0     | 0.03  | 0     | 0     | 0     | 0     | 0.07  | 0.78  | 0    | 0     | 0.03  |
| Pgr015700.1 (PgrABCG38) | 1.21  | 0.45  | 0.46  | 0.04  | 0.03  | 0.03  | 0.07  | 0.03  | 0.03  | 1.58 | 0     | 0.03  |
| Pgr003279.1 (PgrABCG39) | 0     | 0     | 0     | 0.1   | 0     | 0     | 0     | 0     | 0     | 0    | 0     | 0.04  |
| Pgr015047.1 (PgrABCG40) | 35.95 | 3.67  | 2.61  | 0.58  | 0.17  | 0.34  | 0.2   | 0.87  | 3.1   | 0    | 0.43  | 0.66  |
| Pgr017152.2 (PgrABCG41) | 0.35  | 0.7   | 0.11  | 0.06  | 0     | 0     | 0     | 0     | 0     | 8.87 | 0.11  | 0     |
| Pgr001872.1 (PgrABCG42) | 1.36  | 0.14  | 0.47  | 0.85  | 1.24  | 1.77  | 6.39  | 11.05 | 6.31  | 0.92 | 1.95  | 2.12  |
| Pgr001873.1 (PgrABCG43) | 21.75 | 2.16  | 88.99 | 0.53  | 1.18  | 1.77  | 14.45 | 16.1  | 39    | 1.38 | 7.98  | 28.34 |
| Pgr008161.1 (PgrABCG44) | 12.23 | 5.13  | 38.31 | 34.98 | 32.18 | 15.56 | 0.52  | 0.32  | 0     | 0.62 | 2.41  | 1.05  |
| Pgr008155.1 (PgrABCG45) | 4.23  | 2.45  | 4.54  | 1.04  | 5.17  | 35.92 | 11.69 | 25.95 | 48.15 | 0.37 | 6.28  | 51.58 |
| Pgr008153.1 (PgrABCG46) | 1.16  | 0     | 0     | 0     | 0     | 0     | 0     | 0     | 1.66  | 0    | 0     | 0     |
| Pgr000834.2 (PgrABCG47) | 32.33 | 24.54 | 11.5  | 23.87 | 9.46  | 22.16 | 0.6   | 0.39  | 0.22  | 9.41 | 12.19 | 15.04 |
