# Supplementary material for: Characterization of the ABC Transporter G Subfamily in Pomegranate and Function Analysis of PgrABCG14
Source: MDPI journal article supplement (doi:10.3390/ijms231911661), 2022-10-01
Supplement: s1 [file s1]

Table S2. The sequences information of each conserved motif

|          |                                                     |
|----------|-----------------------------------------------------|
| Motif 1  | RGJSGGZRKRVSIGVEJVANPSJJFLDEPTSGLDSRAAAIVMRTLRLNAD  |
| Motif 2  | AJMGPSGAGKTTLLDVLAGRLTGG                            |
| Motif 3  | SGYVEQBDILSPTLTVRETLLYSAWLRLP                       |
| Motif 4  | RTVVISJHQSPETFDLFDDJILLSEG                          |
| Motif 5  | FFESMGFKCPERKGVADFLQEVTSKKDQEQYW                    |
| Motif 6  | FNLFSGFFIPRPRIPKWWRWYYWISPVAWTLYGLLASZFGD           |
| Motif 7  | PVFAEERTVFYRERAAAGMYSSSAYALANV                      |
| Motif 8  | EMTVRETLDIFSARCQGVGTRYEMLAELSRREKEAGIKPDPEIDAFMKATA |
| Motif 9  | RLPVFYKQRDFLFYPAWAYALPTWILKIPISLLESGIWVILTYYYVIGFAP |
| Motif 10 | NKELIKELSTPPPGSKDLYFPTQYSQSFFTQCKACLWKQHWSYWRNPQYN  |
| Motif 11 | CADTMVGDEMRRGISGGQKKRVTTGEMJVGPALFMDEISTGLDSSTTF    |
| Motif 12 | KACFAREWLLMKRNSFVYIFKTVQJTIMALITMTVFLRTEM           |
| Motif 13 | TILQDVSGHIKPSRMTLLLGPFGSGKTLLLALAGKLDKDL            |
| Motif 14 | TFDNVNYYVDMPEMKEQGVEEDRLQLLRDVSAGFRPGVLT            |
| Motif 15 | SKEEKRERVEEVIEELGLDDLRLBTLVGLP                      |
