# Supplementary material for: Characterization of the ABC Transporter G Subfamily in Pomegranate and Function Analysis of PgrABCG14
Source: MDPI journal article supplement (doi:10.3390/ijms231911661), 2022-10-01
Supplement: s1 [file s1]

Table S1. Characteristics of *PgrABCG* genes and the encoded proteins.

| Gene Name | Gene ID     | Protein Length (aa) | MW (kDa) | pI   | Exon Number | TMH | Subcellar location            |
|-----------|-------------|---------------------|----------|------|-------------|-----|-------------------------------|
| PgrABCG1  | Pgr001757.3 | 711                 | 78.38    | 7.94 | 8           | 6   | PM                            |
| PgrABCG2  | Pgr001930.1 | 738                 | 82.36    | 9.84 | 4           | 6   | PM                            |
| PgrABCG3  | Pgr026873.1 | 721                 | 80.03    | 8.96 | 12          | 6   | PM                            |
| PgrABCG4  | Pgr023015.1 | 604                 | 67.25    | 9.34 | 1           | 7   | PM                            |
| PgrABCG5  | Pgr028234.1 | 638                 | 71.12    | 9.26 | 2           | 6   | PM                            |
| PgrABCG6  | Pgr025964.1 | 744                 | 81.83    | 9.51 | 1           | 7   | PM                            |
| PgrABCG7  | Pgr004482.1 | 746                 | 81.88    | 7.08 | 10          | 4   | PM Chloroplast<br>Cytoplasmic |
| PgrABCG8  | Pgr002440.1 | 638                 | 70.58    | 9.11 | 5           | 6   | PM                            |
| PgrABCG9  | Pgr008023.1 | 625                 | 69.47    | 9.46 | 4           | 5   | PM                            |
| PgrABCG10 | Pgr001466.1 | 597                 | 67.00    | 9.37 | 1           | 6   | PM                            |
| PgrABCG11 | Pgr005352.1 | 689                 | 76.60    | 8.69 | 11          | 6   | PM                            |
| PgrABCG12 | Pgr025353.1 | 697                 | 76.98    | 8.98 | 10          | 6   | PM                            |
| PgrABCG13 | Pgr008164.1 | 613                 | 68.04    | 8.51 | 7           | 6   | PM                            |
| PgrABCG14 | Pgr018151.1 | 668                 | 74.22    | 8.82 | 6           | 6   | PM                            |
| PgrABCG15 | Pgr008156.1 | 592                 | 66.38    | 8.78 | 8           | 5   | PM                            |
| PgrABCG16 | Pgr008162.1 | 576                 | 64.64    | 8.79 | 7           | 5   | PM                            |
| PgrABCG17 | Pgr013392.1 | 746                 | 83.44    | 9.39 | 17          | 6   | PM                            |
| PgrABCG18 | Pgr019302.7 | 852                 | 96.61    | 8.8  | 15          | 9   | PM                            |
| PgrABCG19 | Pgr021626.1 | 1256                | 142.05   | 8.51 | 21          | 12  | PM                            |
| PgrABCG20 | Pgr001931.1 | 754                 | 82.91    | 8.56 | 20          | 7   | PM                            |
| PgrABCG21 | Pgr009460.1 | 675                 | 75.24    | 9.39 | 7           | 7   | PM                            |
| PgrABCG22 | Pgr003186.1 | 760                 | 83.68    | 9.09 | 10          | 5   | PM                            |
| PgrABCG23 | Pgr025323.4 | 654                 | 73.69    | 8.95 | 2           | 5   | PM                            |

|           |             |      |        |      |    |    |                          |
|-----------|-------------|------|--------|------|----|----|--------------------------|
| PgrABCG24 | Pgr025550.1 | 1055 | 117.12 | 9.02 | 13 | 6  | PM Mitochondrial Nuclear |
| PgrABCG25 | Pgr007499.1 | 620  | 69.25  | 6.84 | 2  | 6  | PM                       |
| PgrABCG26 | Pgr007422.1 | 674  | 75.95  | 9.02 | 9  | 6  | PM                       |
| PgrABCG27 | Pgr025164.1 | 1394 | 157.64 | 6.56 | 17 | 13 | PM                       |
| PgrABCG28 | Pgr026882.1 | 1116 | 123.27 | 8.98 | 15 | 5  | PM                       |
| PgrABCG29 | Pgr012415.1 | 1484 | 167.84 | 8.47 | 22 | 13 | PM                       |
| PgrABCG30 | Pgr026142.1 | 1051 | 118.16 | 7.57 | 14 | 8  | PM                       |
| PgrABCG31 | Pgr024930.1 | 1475 | 165.19 | 8.73 | 23 | 11 | PM                       |
| PgrABCG32 | Pgr015424.1 | 1418 | 162.36 | 8.79 | 24 | 13 | PM                       |
| PgrABCG33 | Pgr008163.1 | 687  | 75.67  | 8.59 | 8  | 6  | PM                       |
| PgrABCG34 | Pgr003278.1 | 1401 | 158.71 | 7.16 | 20 | 13 | PM                       |
| PgrABCG35 | Pgr025165.1 | 1446 | 164.12 | 6.36 | 18 | 15 | PM                       |
| PgrABCG36 | Pgr005475.1 | 1496 | 169.51 | 7.73 | 22 | 13 | PM                       |
| PgrABCG37 | Pgr020172.2 | 1448 | 163.87 | 8.42 | 25 | 13 | PM                       |
| PgrABCG38 | Pgr015700.1 | 1451 | 164.99 | 8.81 | 23 | 13 | PM                       |
| PgrABCG39 | Pgr003279.1 | 605  | 69.19  | 6.27 | 8  | 4  | PM Cytoplasmic           |
| PgrABCG40 | Pgr015047.1 | 1416 | 160.51 | 8.4  | 24 | 13 | PM                       |
| PgrABCG41 | Pgr017152.2 | 874  | 99.39  | 8.41 | 14 | 8  | PM                       |
| PgrABCG42 | Pgr001872.1 | 1449 | 163.12 | 8.27 | 24 | 13 | PM                       |
| PgrABCG43 | Pgr001873.1 | 1449 | 163.10 | 7.84 | 24 | 13 | PM                       |
| PgrABCG44 | Pgr008161.1 | 683  | 75.90  | 7.9  | 9  | 6  | PM                       |
| PgrABCG45 | Pgr008155.1 | 683  | 75.98  | 6.87 | 9  | 6  | PM                       |
| PgrABCG46 | Pgr008153.1 | 659  | 72.95  | 8.52 | 8  | 6  | PM                       |
| PgrABCG47 | Pgr000834.2 | 1345 | 152.24 | 8.57 | 22 | 11 | PM                       |

---

aa, amino acids; MW, Molecular weight; pI, isoelectric point; TMH, transmembrane helices; PM, plasma membrane.
