# Supplementary material for: Characterization of the ABC Transporter G Subfamily in Pomegranate and Function Analysis of PgrABCG14
Source: MDPI journal article supplement (doi:10.3390/ijms231911661), 2022-10-01
Supplement: s1 [file s1]

Table S3. The functional annotation of the genes which co-expressed with the candidate *PgrABCG* genes

| Gene        | KEGG Orthology                                                                                                                                                                                                                                                                                                                                                                                                                      |
|-------------|-------------------------------------------------------------------------------------------------------------------------------------------------------------------------------------------------------------------------------------------------------------------------------------------------------------------------------------------------------------------------------------------------------------------------------------|
| Pgr020519.1 | K01850 1 3e-123 441 vvi:100266283 chorismate mutase [EC:5.4.99.5]                                                                                                                                                                                                                                                                                                                                                                   |
| Pgr021671.1 | K13066 1 2e-125 449 pop:POPTR_0012s00670g caffeic acid 3-O-methyltransferase [EC:2.1.1.68]                                                                                                                                                                                                                                                                                                                                          |
| Pgr014360.1 | K13065 1 5e-40 164 rcu:RCOM_1600120 shikimate O-hydroxycinnamoyltransferase [EC:2.3.1.133]                                                                                                                                                                                                                                                                                                                                          |
| Pgr011699.1 | K14454 1 4e-160 564 egr:104436950 aspartate aminotransferase, cytoplasmic [EC:2.6.1.1]                                                                                                                                                                                                                                                                                                                                              |
| Pgr026548.1 | K00276 1 8e-141 501 sot:102600413 primary-amine oxidase [EC:1.4.3.21];K04733 2 5e-140 499 mdm:103412692 interleukin-1 receptor-associated kinase 4 [EC:2.7.11.1]                                                                                                                                                                                                                                                                    |
| Pgr003031.1 | K14432 1 1e-89 330 cic:CICLE_v10012205mg ABA responsive element binding factor                                                                                                                                                                                                                                                                                                                                                      |
| Pgr000815.1 | K14484 1 2e-49 195 fve:101293288 auxin-responsive protein IAA                                                                                                                                                                                                                                                                                                                                                                       |
| Pgr003564.1 | K14496 1 7e-93 339 cic:CICLE_v10022440mg abscisic acid receptor PYR/PYL family                                                                                                                                                                                                                                                                                                                                                      |
| Pgr010226.1 | K14486 1 4e-149 528 pper:PRUPE_ppa022314mg auxin response factor                                                                                                                                                                                                                                                                                                                                                                    |
| Pgr022934.2 | K13415 1 2e-168 594 tcc:TCM_001284 protein brassinosteroid insensitive 1 [EC:2.7.10.1 2.7.11.1]                                                                                                                                                                                                                                                                                                                                     |
| Pgr008154.1 | K14513 1 2e-46 186 mdm:103408320 ethylene-insensitive protein 2;K09833 2 3e-33 142 cit:102609326 homogentisate phytyltransferase / homogentisate geranylgeranyltransferase [EC:2.5.1.115 2.5.1.116];K13356 3 2e-19 96.3 pda:103696395 alcohol-forming fatty acyl-CoA reductase [EC:1.2.1.84];K10395 4 8e-19 94.7 pmum:103342269 kinesin family member 4/21/27;K15086 5 1e-16 87.8 atr:18440990 (3S)-linalool synthase [EC:4.2.3.25] |
| Pgr008512.1 | K10760 1 5e-116 417 egr:104414901 adenylate isopentenyltransferase (cytokinin synthase)                                                                                                                                                                                                                                                                                                                                             |
| Pgr011139.1 | K10760 1 4e-105 381 egr:104453788 adenylate isopentenyltransferase (cytokinin synthase)                                                                                                                                                                                                                                                                                                                                             |
| Pgr004223.1 | K10760 1 1e-98 360 vvi:100247527 adenylate isopentenyltransferase (cytokinin synthase)                                                                                                                                                                                                                                                                                                                                              |
| Pgr011278.1 | K14491 1 0.0 828 tcc:TCM_021300 two-component response regulator ARR-B family                                                                                                                                                                                                                                                                                                                                                       |
| Pgr015797.1 | K14491 1 3e-82 306 csv:101215220 two-component response regulator ARR-B family                                                                                                                                                                                                                                                                                                                                                      |
